# Supplementary material
Source: PubMed Central journal article supplement (PMC5947832)
Supplement: NPH-218-1049-s001.pdf [file NPH-218-1049-s001.pdf]

### ***New Phytologist* Supporting Information**

Article title: Identification of an algal xylan synthase KfXYS1 proves that there is functional orthology between algal and plant cell wall biosynthesis

Authors: Jacob Krüger Jensen, Marta Busse-Wicher, Christian Peter Poulsen, Jonatan Ulrik Fangel, Peter James Smith, Jeong-Yeh Yang, Maria-Jesus Peña, Malene Hesselund Dinesen, Helle Juel Martens, Michael Melkonian, Gane Ka-Shu Wong, Kelley W. Moremen, Curtis Gene Wilkerson, Henrik Vibe Scheller, Paul Dupree, Peter Ulvskov, Breeanna Rae Urbanowicz and Jesper Harholt

Article acceptance date: 14 January 2018

The following Supporting Information is available for this article:

**Fig. S1** SDS-gel of purified GFP-KfXYS1 expressed in HEK293 cell culture

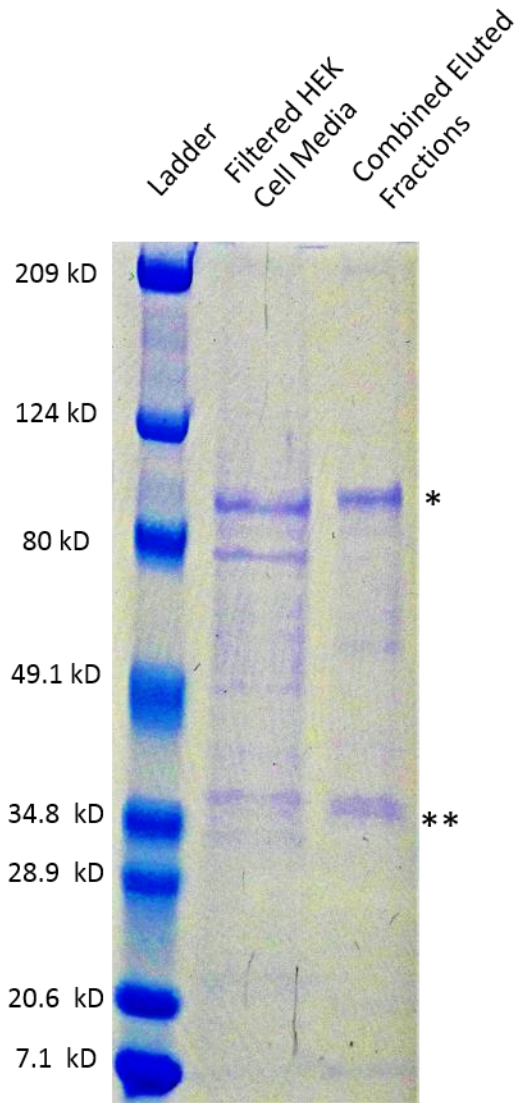

Fig. S1 Purification of recombinant GFP-KfXYS1. Lane 1, Broad Range Prestained SDS-PAGE Standard (Bio-Rad); Lane 2, HEK293 cell culture medium; Lane 3, pooled eluted protein. The gel was stained with coomassie brilliant blue R-250 (Bio-Rad). \*KfXYS1( MW 85.46kD) and \*\*His-Avi-GFP (MW 33.2kD).



Fig. S3 Phylogenetic tree of IRX15/GXMT1 orthologs.

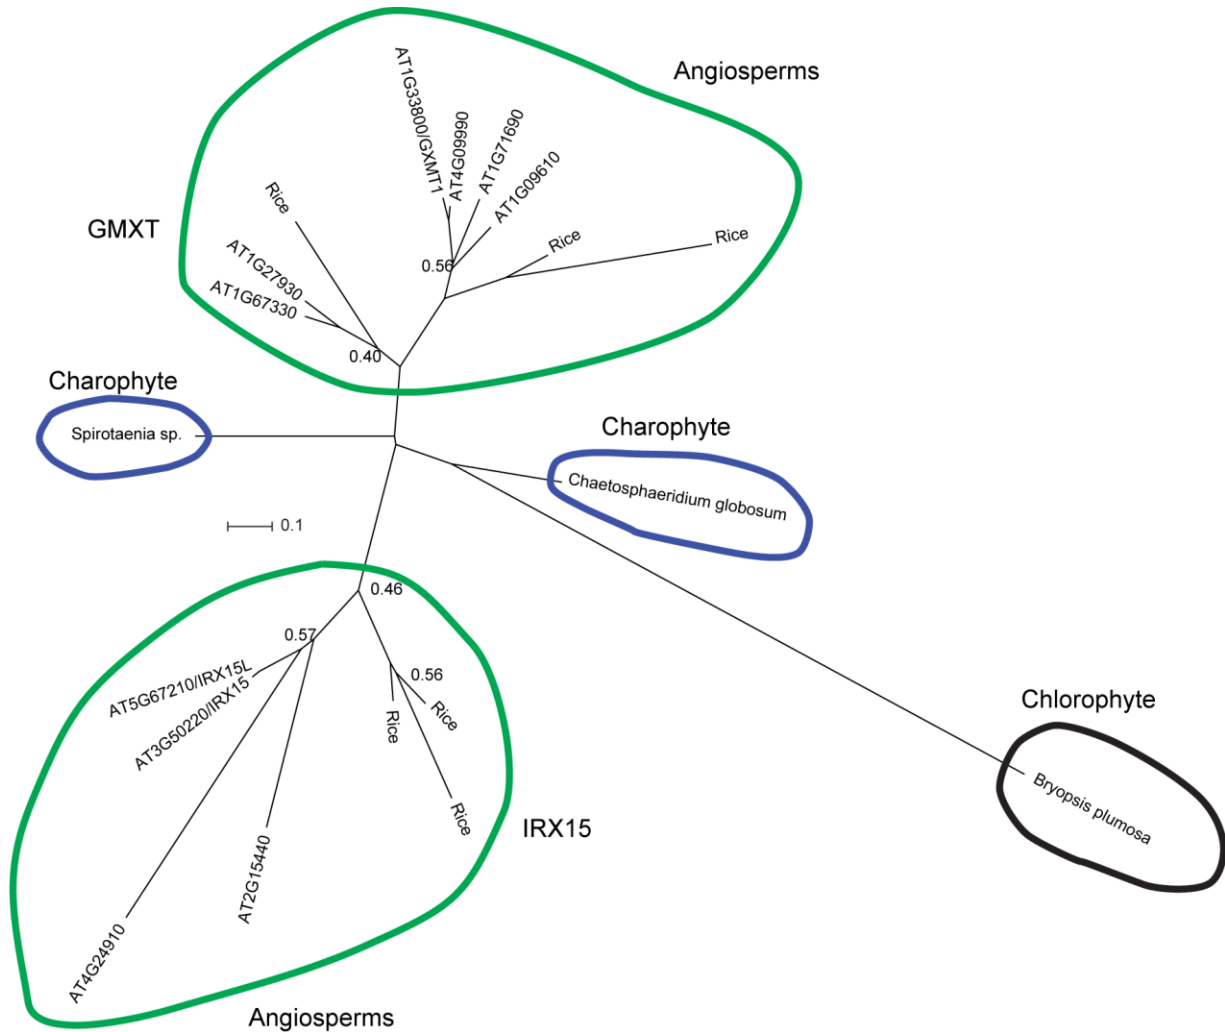

Fig. S3. Phylogenetic tree of IRX15/GXMT1 orthologs. Sequences included from chlorophyte and charophyte green algae, rice and Arabidopsis. Encircling indicate sequences from angiosperms (green), chlorophytes (black) and charophytes (dark blue). For angiosperms, the IRX15 and GXMT1 orthologs group in two separate groups, respectively. Chlorophyte and charophyte branches correspond to sequences from 1kp dataset and are probably not full length. Branch support was evaluated with Approximate Likelihood-Ratio Test and is given as a value between 0 and 1. Supporting Information Notes S1 holds tree files where all sequences used are labeled.



*Selaginella moellendorffii*, rice and Arabidopsis. Encircling indicate charophytes (dark blue) and Zygnematophyceae sensu stricto (light blue). Branches with no name correspond to charophyte sequences from 1kp dataset and are probably not full length. All branches with names are sequences from complete genome projects. Branch support was evaluated with Approximate Likelihood-Ratio Test and is given as a value between 0 and 1. Supporting Information Notes S1 holds tree files where all sequences used are labeled.

Fig. S5 Phylogenetic tree of IRX8 orthologs.

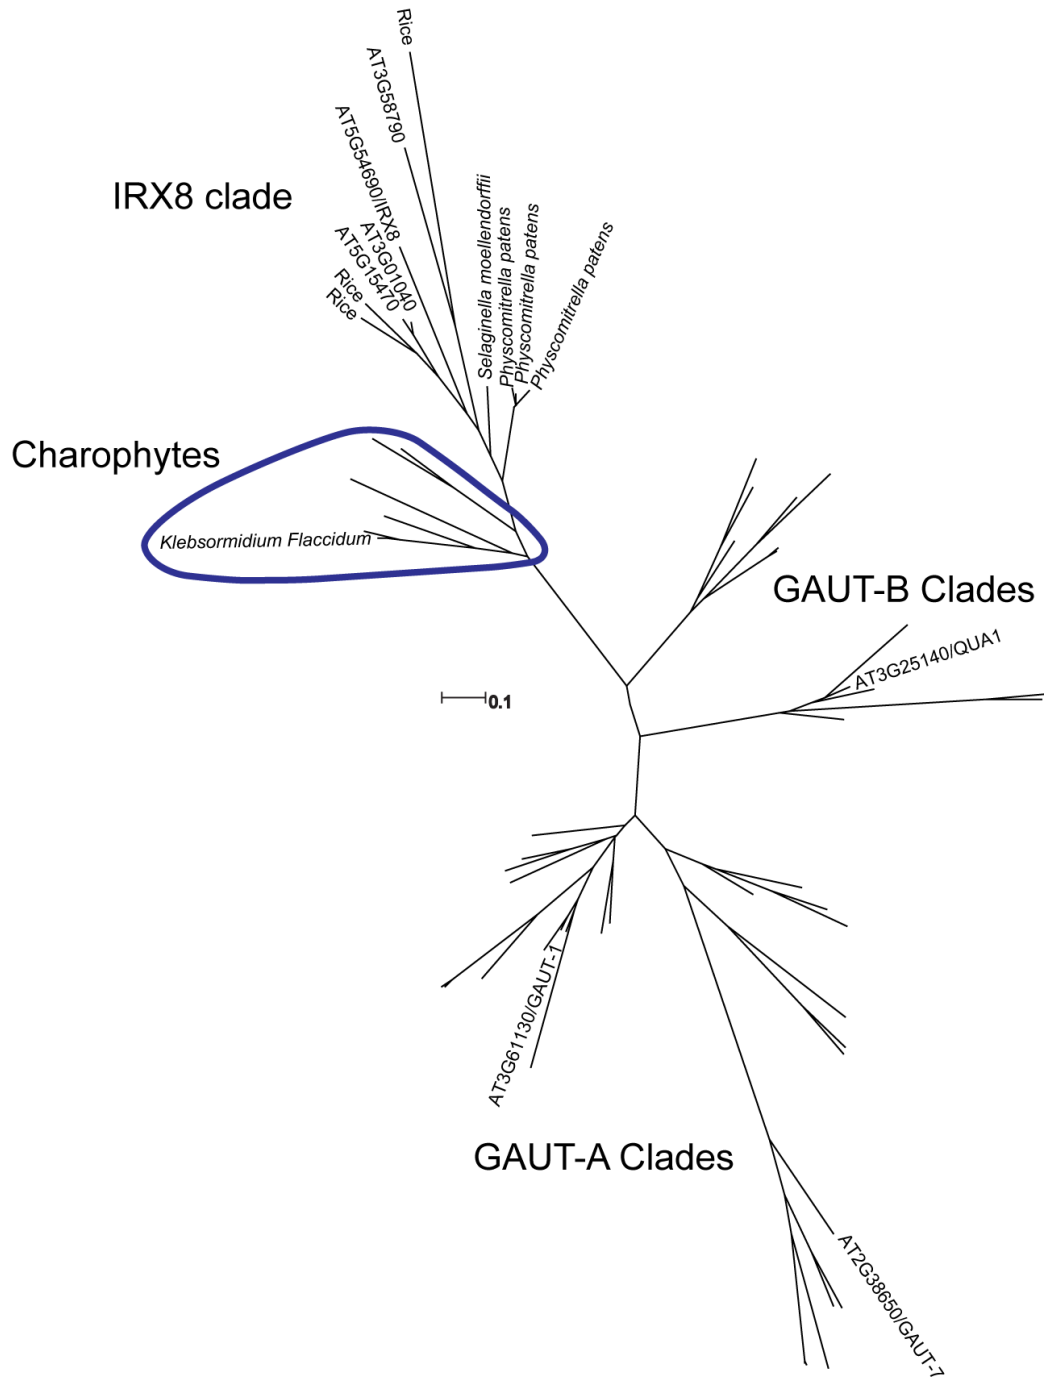

Fig. S5. Phylogenetic tree of IRX8 orthologs. Sequences included from charophytes, *Klebsormidium flaccidum*, *Physcomitrella patens*, *Selaginella moellendorffii*, rice and Arabidopsis. Encircling indicates sequences from a group of several species of charophytes

(dark blue). Branches in encircling with no name correspond to charophyte sequences from 1kp dataset and are probably not full length. Branches in GAUT-A and GAUT-B clades are full length sequences from *Physcomitrella patens*, *Selaginella moellendorffii*, rice and Arabidopsis. Branch support was evaluated with Approximate Likelihood-Ratio Test and is given as a value between 0 and 1. Supporting Information Notes S1 holds tree files where all sequences used are labeled.



Fig. S6 Phylogenetic tree of GUX1-5 orthologs.

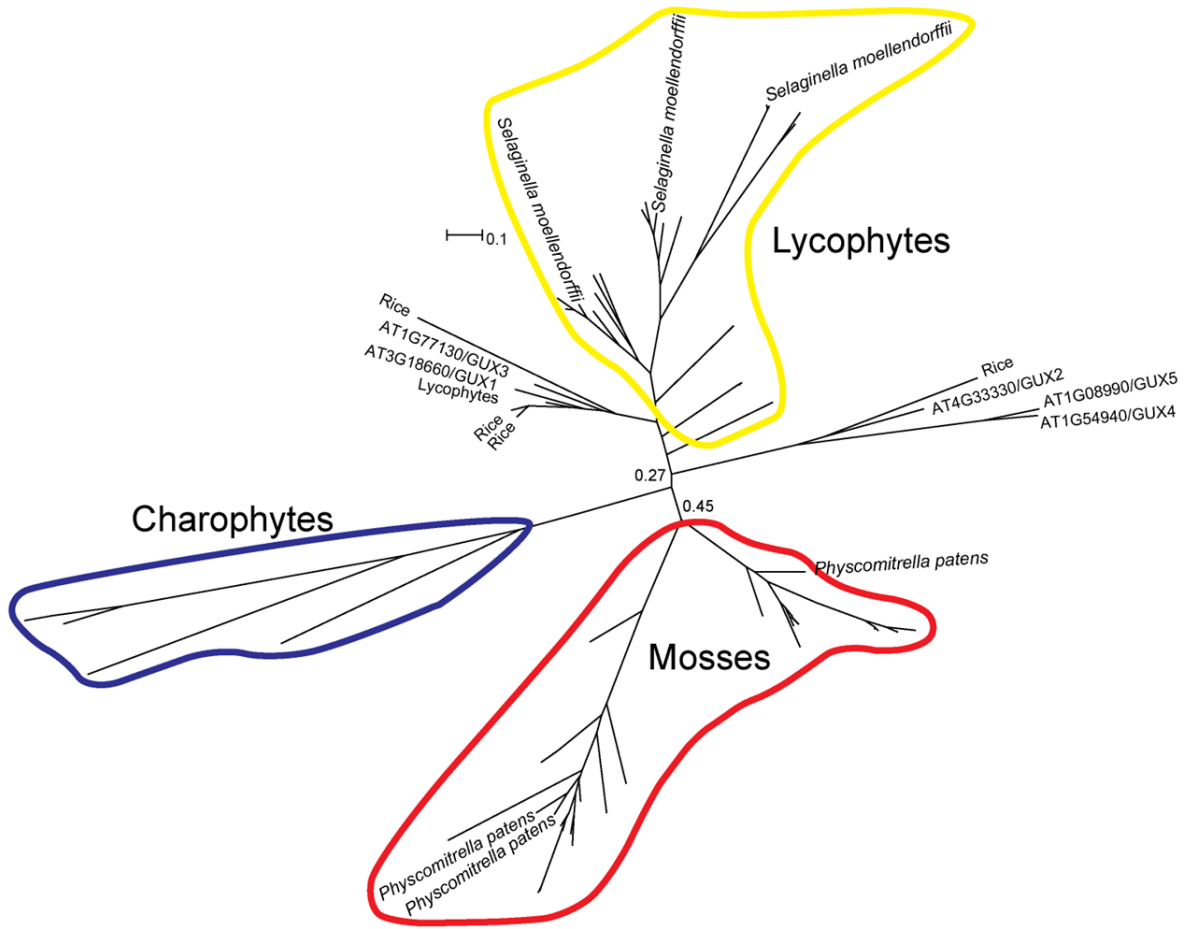

Fig. S6. Phylogenetic tree of GUX1-5 orthologs. Sequences included from charophytes, *Klebsormidium flaccidum*, *Physcomitrella patens*, *Selaginella moellendorffii*, rice and Arabidopsis. Encircling indicate sequences from Charophytes (dark blue), mosses (red) and lycophytes (yellow). Branches with no name correspond to charophyte, moss and lycophyte sequences from 1kp dataset and are probably not full length. All branches with names are sequences from complete genome projects. Branch support was evaluated with Approximate Likelihood-Ratio Test and is given as a value between 0 and 1. Supporting Information Notes S1

holds tree files where all sequences used are labeled.

Fig. S7 Phylogenetic tree of ESK1 orthologs.

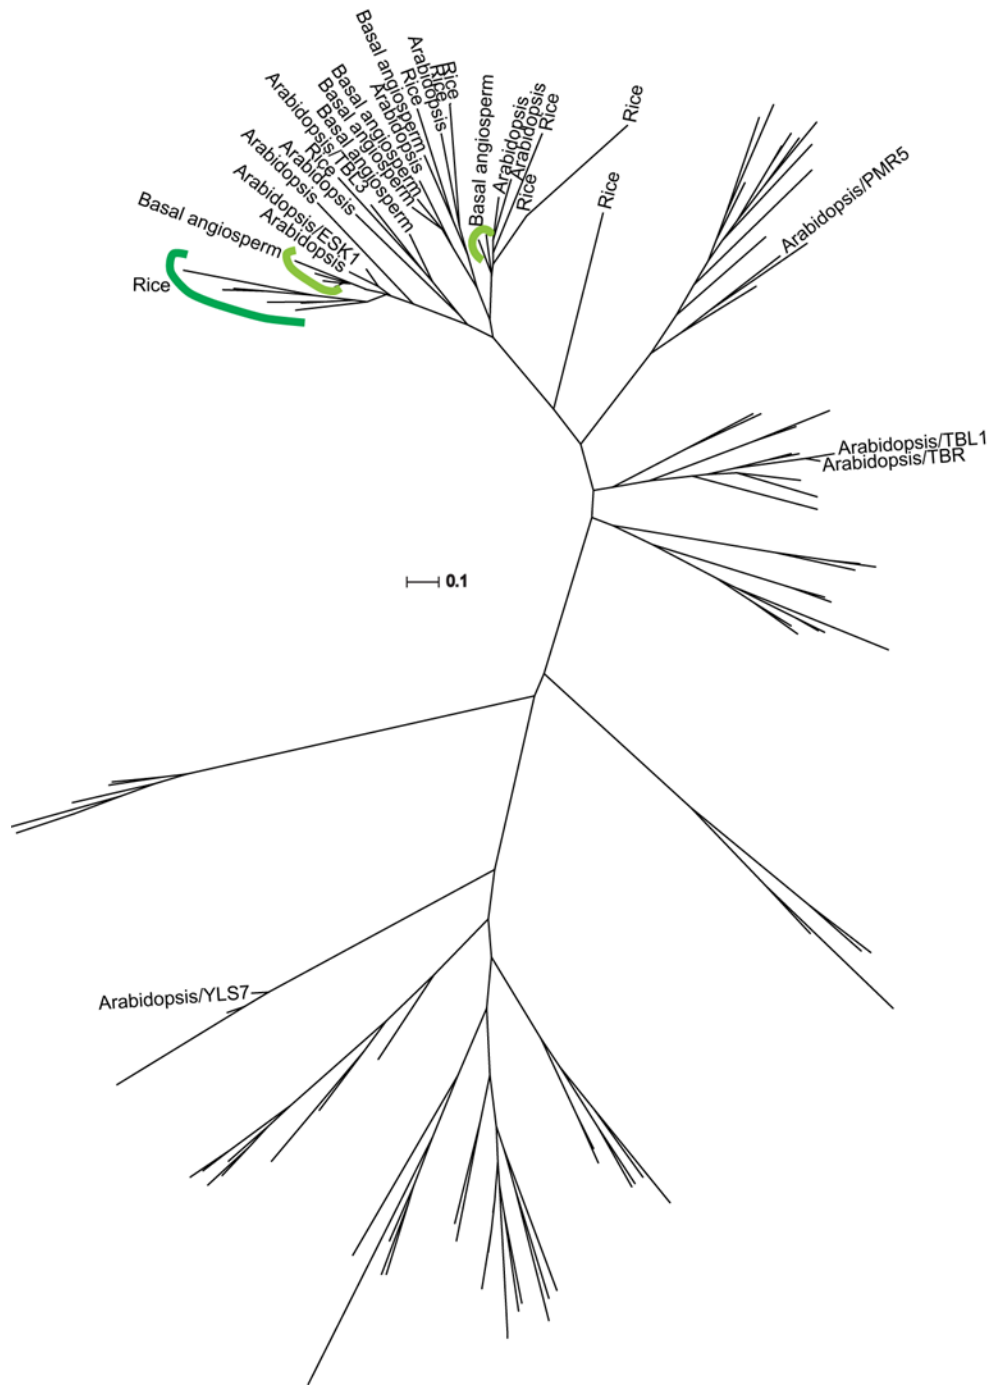

Fig. S7. Phylogenetic tree of ESK1 orthologs. Sequences included from basal angiosperms, rice, Arabidopsis and from the 1kp dataset. Encircling indicates sequences from rice (dark green) and basal angiosperms (light green). Branches in the TBL3 clade named basal angiosperm

correspond to basal angiosperm sequences from 1kp dataset and are probably not full length.

Branches with no name are either rice or Arabidopsis full length sequences. Branch support was evaluated with Approximate Likelihood-Ratio Test and is given as a value between 0 and 1.

Supporting Information Notes S1 holds tree files where all sequences used are labeled.

**Fig. S8** Phylogenetic tree of GT61 orthologs.

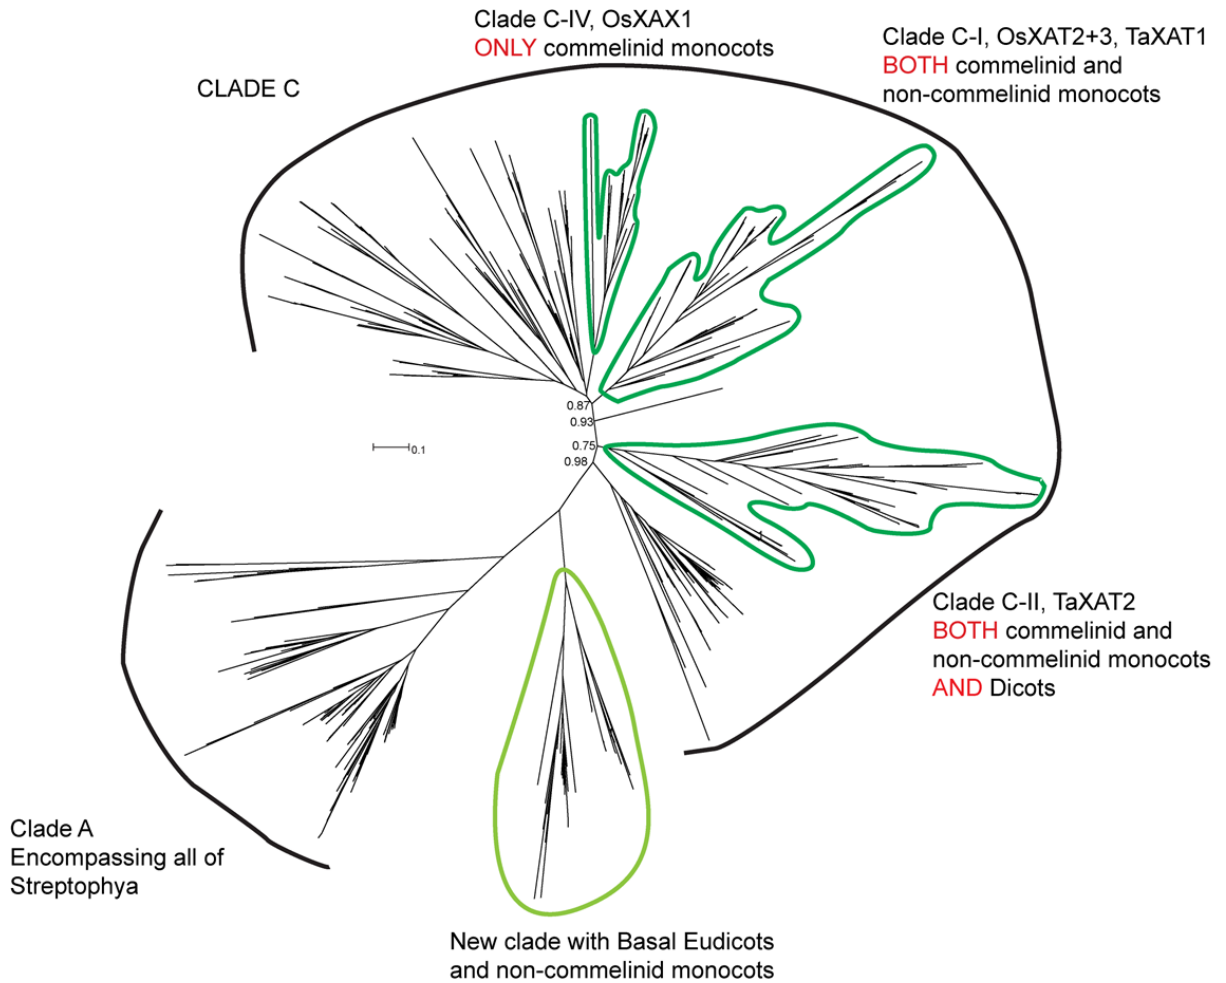

Fig. S8. Phylogenetic tree of GT61 orthologs. Sequences included from *Physcomitrella patens*, *Selaginella moellendorffii*, rice, Arabidopsis and angiosperms from the 1kp dataset. Clade B, encompassing AtXYLT, which is involved in N-glycan biosynthesis, is not included in the tree. Three subclades in the Clade C are individually encircled (green) and each hold at least one member of a proven xylan arabinosyltransferases (XA) from either rice or wheat. As indicated, these three clades contain commelinid monocots only (Clade C-IV), non-commelinid and

commelinid monocots (Clade C-I) and non-commelinid and commelinid monocots as well as dicots (Clade C-II). A new clade with basal eudicots and non-commelinid monocots were also identified (light green encircling). Branch support was evaluated with Approximate Likelihood-Ratio Test and is given as a value between 0 and 1. Supporting Information Notes S1 holds tree files where all sequences used are labeled.

**Fig. S9** Phylogenetic tree of OsAT10 orthologs.

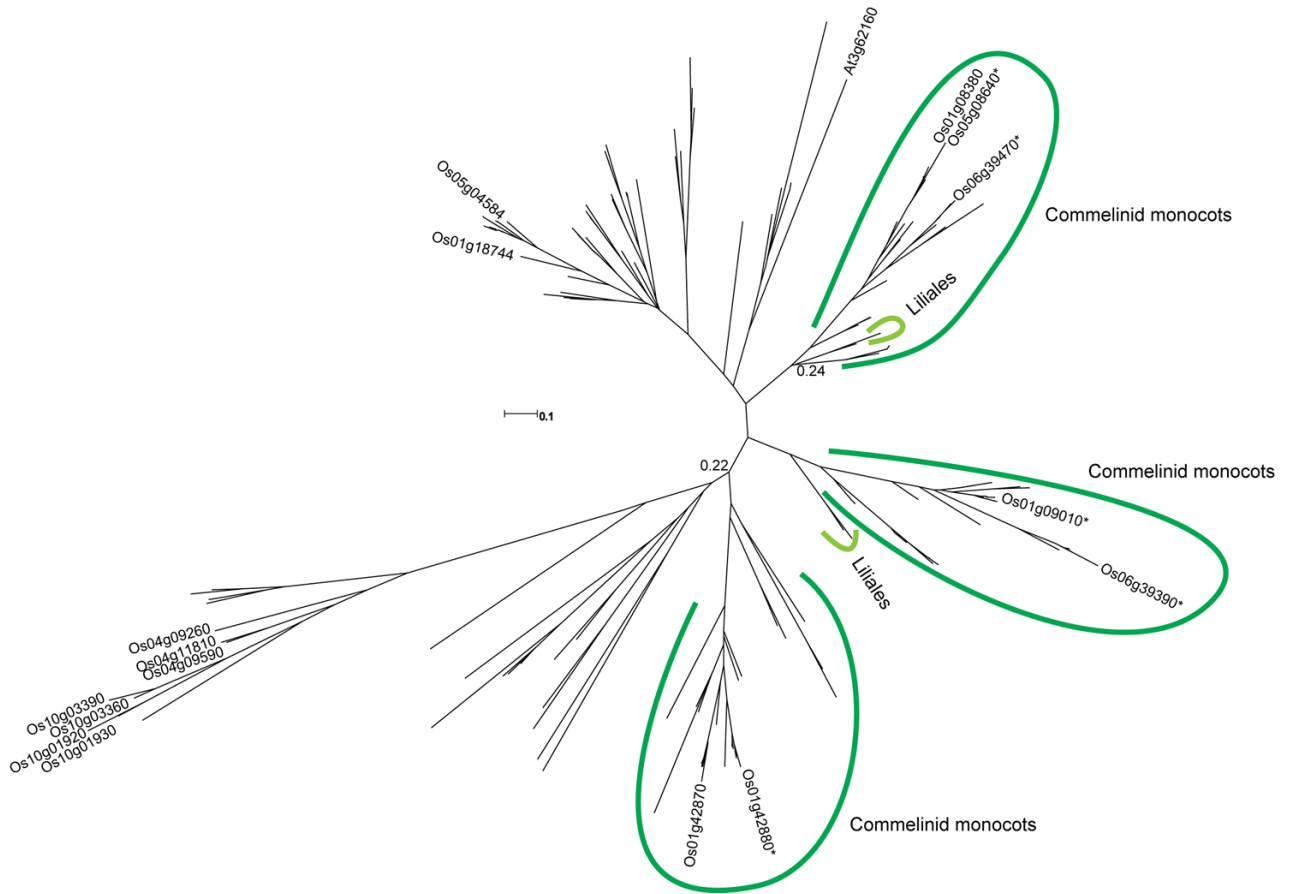

Fig. S9. Phylogenetic tree of OsAT10 orthologs. Sequences included from rice, Arabidopsis and monocots from the 1kp dataset. Rice OsAT10 is a putative cell wall related acyltransferase (BAHD) involved in ferulic or coumaric acid substitution of xylan. Sequences marked with asterisk are putative xylan ferulic or coumaric acid transferases. Encircling indicates sequences from a group of several species of commelinid monocots (dark green) and of lilioid monocots (light green). Branches with no name correspond to monocot sequences from 1kp dataset and are probably not full length. All branches with names are sequences from complete genome projects. Branch support was evaluated with Approximate Likelihood-Ratio Test and is given as a value between 0 and 1. Supporting Information Notes S1 holds tree files where all sequences

used are labeled.



**Fig. S10** Enzymatic specificity of KfXYS1.

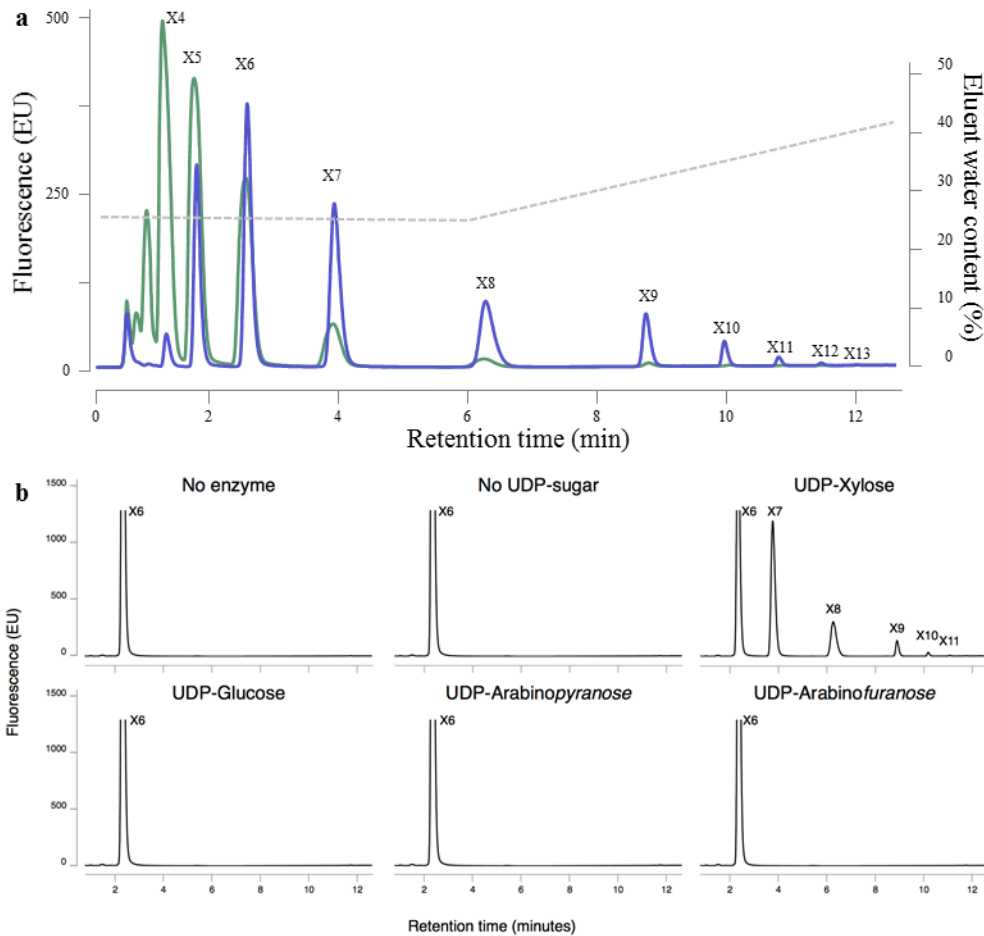

Fig. S10 Enzymatic specificity of KfXYS1. (a) KfXYS1 enzymatic product analysis by use of 1,4- $\beta$ -xylanase. KfXYS1 protein was heterologously expressed in *Saccharomyces cerevisiae*. Reaction mixtures with UDP-xylose, fluorescently labeled xylotetraose (X4) and KfXYS1 preparation before (blue) and after xylanase treatment (green) were analyzed by HPLC. The shift in distribution towards X4-X6 shows that the xylanase is degrading areas of the oligos formed by KfXYS1 (from X4 and UDP-xylose) and so proves that the linkages formed are 1,4- $\beta$ -linkages. Gray dashed line, eluent water content (right y-axis). X4-X13, progressively longer labeled xylan oligosaccharides.

(b) Donor substrate specificity of KfXYS1 protein heterologously expressed in *S. cerevisiae*.

Reactions were performed with mixtures of the indicated UDP-sugars in combination with labeled xylohexaose (X6) and recombinant KfIRX10 protein preparation. Reactions were analyzed by HPLC.

**Fig. S11** Characterization of reaction mixtures with or without KfXYS1 by 1D <sup>1</sup>H NMR.

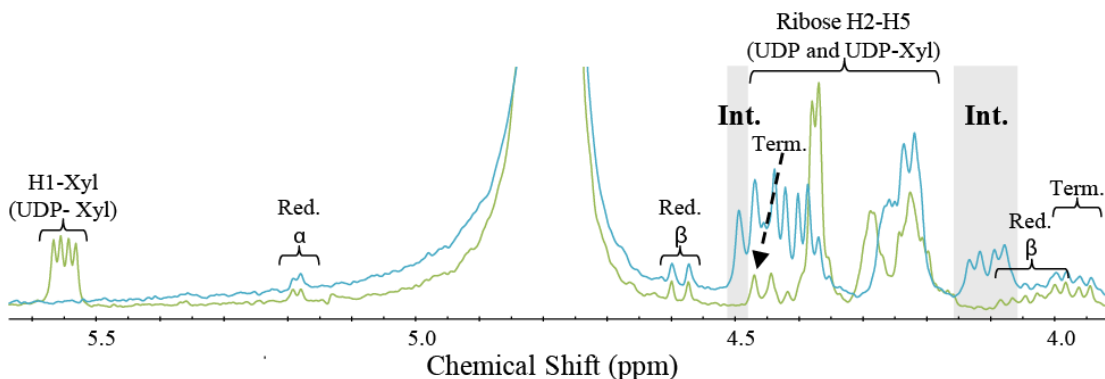

**Fig. S11.** Characterization of reaction mixtures with or without KfXYS1 by 1D <sup>1</sup>H NMR.

The control spectrum of reaction mixture containing xylobiose and UDP-xylose only (green) contained signals of terminal (Term.) and reducing (Red.) xylose. KfXYS1 reaction spectrum (blue) after 16 h incubation containing diagnostic signals of internal  $\beta$ -1,4-xylose linkages (Int.; grey shade) that are absent in the control. Signals corresponding to H1 of the xylose of UDP-xylose in the control spectrum, are absent in the spectrum of the KfXYS1 reaction and only signals of UDP are present.

**Table S1** Positive/negative list used for identification of xylan synthesis related sequences

| ID         | Function                       | AGI        | Family  | Subfamily | Name                 | Control1  | Control2  | Control3  | Control4  | Control5  |
|------------|--------------------------------|------------|---------|-----------|----------------------|-----------|-----------|-----------|-----------|-----------|
| At1g27440  | Xylan beta-1,4-XylT            | At1g27440  | GT47    | D         | IRX10                | At3g57630 | At1g21480 | At5g33290 | At2g35100 | At5g62220 |
| At5g61840  | Xylan beta-1,4-XylT            | At5g61840  | GT47    | D         | IRX10L               | At3g57630 | At1g21480 | At5g33290 | At2g35100 | At5g62220 |
| At2g28110  | Xylan backbone related         | At2g28110  | GT47    | D         | IRX7                 | At3g57630 | At1g21480 | At5g33290 | At2g35100 | At5g62220 |
| At5g22940  | Xylan backbone related         | At5g22940  | GT47    | D         | IRX7L                | At3g57630 | At1g21480 | At5g33290 | At2g35100 | At5g62220 |
| At2g37090  | Xylan backbone related         | At2g37090  | GT43    | GT43A     | IRX9                 | AAH71961  | -         | -         | -         | -         |
| At1g27600  | Xylan backbone related         | At1g27600  | GT43    | GT43A     | IRX9L                | AAH71961  | -         | -         | -         | -         |
| At4g36890  | Xylan backbone related         | At4g36890  | GT43    | GT43B     | IRX14                | AAH71961  | -         | -         | -         | -         |
| At5g67230  | Xylan backbone related         | At5g67230  | GT43    | GT43B     | IRX14L               | AAH71961  | -         | -         | -         | -         |
| At5g54690  | Xylan backbone related         | At5g54690  | GT8     | GAUT      | IRX8                 | At3g61130 | At2g20810 | -         | -         | -         |
| At1g19300  | Xylan backbone related         | At1g19300  | GT8     | GATL      | PARVUS               | At3g61130 | At2g20810 | -         | -         | -         |
| At3g18660  | Xylan alpha-1,2-GlcAT          | At3g18660  | GT8     | GUX       | GUX1                 | At5g18480 | -         | -         | -         | -         |
| At4g33330  | Xylan alpha-1,2-GlcAT          | At4g33330  | GT8     | GUX       | GUX2                 | At5g18480 | -         | -         | -         | -         |
| At1g77130  | Xylan alpha-1,2-GlcAT          | At1g77130  | GT8     | GUX       | GUX3                 | At5g18480 | -         | -         | -         | -         |
| At1g54940  | Xylan alpha-1,2-GlcAT          | At1g54940  | GT8     | GUX       | GUX4                 | At5g18480 | -         | -         | -         | -         |
| At1g08990  | Xylan alpha-1,2-GlcAT          | At1g08990  | GT8     | GUX       | GUX5                 | At5g18480 | -         | -         | -         | -         |
| At1g33800  | Glucuronoxylan 4-O-MethylT     | At1g33800  | DUF579  | DUF579    | GXMT1                | -         | -         | -         | -         | -         |
| At3g50220  | Xylan backbone related         | At3g50220  | DUF579  | DUF579    | IRX15                | -         | -         | -         | -         | -         |
| At5g67210  | Xylan backbone related         | At5g67210  | DUF579  | DUF579    | IRX15L               | -         | -         | -         | -         | -         |
| Os02g22480 | Xylan alpha-1,3-AraT           | Os02g22480 | GT61    | GT61CW    | Os XAT1              | At5g55500 | -         | -         | -         | -         |
| Os03g37010 | Xylan alpha-1,3-AraT           | Os03g37010 | GT61    | GT61CW    | Os XAT2              | At5g55500 | -         | -         | -         | -         |
| FR873610   | Xylan alpha-1,3-AraT           | FR873610   | GT61    | GT61CW    | Ta XAT1              | At5g55500 | -         | -         | -         | -         |
| FR846232   | Xylan alpha-1,3-AraT           | FR846232   | GT61    | GT61CW    | Ta XAT2              | At5g55500 | -         | -         | -         | -         |
| Os02g22380 | Xylan arabinosyl beta-1,2-XylT | Os02g22380 | GT61    | GT61CW    | Os XAX1              | At5g55500 | -         | -         | -         | -         |
| At3g18170  | Putative xylan AraT            | At3g18170  | GT61    | GT61CW    | Closest At to XAT1   | At5g55500 | -         | -         | -         | -         |
| At3g18170  | Putative xylan AraT            | At3g18170  | GT61    | GT61CW    | Closest At to XAT1   | At5g55500 | -         | -         | -         | -         |
| At3g55990  | Xylan acetyltransferase        | At3g55990  | TBR/TBL | TBR/TBL   | TBL29                | At5g58600 | -         | -         | -         | -         |
| Os06g39390 | Xylan coumaroyl transferase    | Os06g39390 | BAHD    | BAHD      | Os AT10              | At3g48720 | -         | -         | -         | -         |
| At3g62160  | -                              | At3g62160  | BAHD    | BAHD      | Closest At to OsAT10 | At3g48720 | -         | -         | -         | -         |

**Table S2** Protein sequences of *Klebsormidium flaccidum* xylan gene orthologs.

| Supplementary Table 1. Protein sequences of <i>Klebsormidium flaccidum</i> xylan gene orthologs |                                                                                                                                                                                                                                                                                                                                                                                                                                                                                                                                                                                                                                                                                                                                                                                                                                                                                                                                                                                                                                                                                                                                                                                                                                                                                                                                                                                                                                                                                                                                                                                                                                                                                                                                                                                                                                                                                                                                                                                                                                                                                                                                                                                                                                                                                                        |
|-------------------------------------------------------------------------------------------------|--------------------------------------------------------------------------------------------------------------------------------------------------------------------------------------------------------------------------------------------------------------------------------------------------------------------------------------------------------------------------------------------------------------------------------------------------------------------------------------------------------------------------------------------------------------------------------------------------------------------------------------------------------------------------------------------------------------------------------------------------------------------------------------------------------------------------------------------------------------------------------------------------------------------------------------------------------------------------------------------------------------------------------------------------------------------------------------------------------------------------------------------------------------------------------------------------------------------------------------------------------------------------------------------------------------------------------------------------------------------------------------------------------------------------------------------------------------------------------------------------------------------------------------------------------------------------------------------------------------------------------------------------------------------------------------------------------------------------------------------------------------------------------------------------------------------------------------------------------------------------------------------------------------------------------------------------------------------------------------------------------------------------------------------------------------------------------------------------------------------------------------------------------------------------------------------------------------------------------------------------------------------------------------------------------|
| IRX10/IRX7 orthologs                                                                            |                                                                                                                                                                                                                                                                                                                                                                                                                                                                                                                                                                                                                                                                                                                                                                                                                                                                                                                                                                                                                                                                                                                                                                                                                                                                                                                                                                                                                                                                                                                                                                                                                                                                                                                                                                                                                                                                                                                                                                                                                                                                                                                                                                                                                                                                                                        |
| kfi00398_0130 / KfirX10                                                                         | MPNKLFTGFAALFCFFLLGSIQRSSLFVLDVENKATVQAAERELTERTWVQEGTGVVARRALLDRLMLEEEVPEDEEDKVPVSLRESPEGRKLVFVYDLPKSYNTKLEKDSRCLNHMFA<br>AEIFVHRNLNNSIRMDPSEADWVFTVYVTTCDLTPNGLPLPKAPQLMRSARVWAEHYPPYVNRSEGADHFFTVPHDFGACFHYQEEAIAKRRLPVLQRATLVQTFQNNHVKKEGSIVV<br>PPYAPPQKMRSRFPIDTPRSIFVYFRGMFYDISNDPEGGYARGARAAIENFKDNPLFDLSDHPSTYYEDMQRAVFCCLPLGWAPWSPRIVESVIFGCIPIVIGDDIVLFPDRAIRWDEISVY<br>VAEKDVQNLDTLITAIKPEEIMAMQRKMWKPEVRTAMLFPQPAEPGDSFHQILNGLARKLPHKPEVFKPGEHPIDWTAGPQQDQDEWRGDDE<br>MPPSDATLGRAGSMNSASGRVSPATNRRKCVGYPASSFCTCASSPAPSTGESLGLQRSSQMSLTSAFSSKQLRQASSTRLDQGAFFYFRQLAFSCTGLMLVLCVALASRHLQHASV<br>DGLERLPPFRDSSRRMMMSADDGIVSTGTTAVIQNGLESTGLALPKKEVFNPSPLGGPLEAPARKYNAIASQMKIYIDLPSTYFNADLVTRDPRILTHMFAAEVLIHYSMLNNSVTRMNPDEADL<br>FFIPVYSTGDLNDQGRALPQMAGMMIKQVMHVVHTWPFNRTHGSDHVVVPHDFGACFTFREEEAIVTRKVPVAVLRKLLMLQTFQGENHTCSRSGRIIPVYVNVVNVKSVPLGPEGP<br>GQPPRDKFAYFRGLVHDFGNPDWGNKYKGVRYQWKKHNDNPLFDVAEMVFPYAYEDMRRSVFCLCPGWAPWSPRIVESLQGGCIPVISDNILPREFVDVPAITVHVPEKDVPRLDEI<br>LSAIPVEEVAAMQKRIWSPAVRRVAVLFPQPAEEGDAFHVYVLELARKLEQRREARQREKDRKSKSKKSPNALRGESQTAALHALR<br>MGGCRRWIAVNVVGVCLLLVFGGVVGPDLTQSLGPGDSKSGRVGSHGRRRARRLQSRRALQQTDRTFARERRRWDAAELQNVGVPVILGRGVSVEDRVLHFRRRIGDSFFEAPEPEW<br>ESQSEPEPEDEVGAESSMEGDTQVLDKSVGEAGSGKTGHKGLGKGGPGSVPELIRDSSEVTRAEFTAPVQTLFVNVTANSTGGAANSSNLEKKGPLLQGLPLNITGGVATNKSRLNQS<br>EFSRDPDFDAHPHILQNVTEAERVEQTAESEPLTKGAPGEVRDIEQEQGLEEIEITAPTQPPEEAEMQNPADPETAPMLVLPQRSIKYIYDLPPLHNRDFVTRDPRVRQTMFATEVLIH<br>ENFEQSAVRTLDPEADFPYIPVYTAAVLEDSGRITPDSHGTMLEAVMYVAERWYPFNMRGLDHVVAPHDYGACFHYRDELASQTKFRMVLRYLTLVQTFQVHNVHCYRPGRSVIPPYI<br>DVRKRLQAFAPERDAHEKSVLAFRGLYDAGNDATGKVVSRGVRLAIGQTFANHPDFDISDAPSLTYLQDMMRATFCLCPGWAPWSPRIFESVQICPIVIAADILPFENYFNWERIARVR<br>KEADVRLLEELKGIPEKVAAMQEAMWDPQVRQALIFPEPAEPGDFAEMILNEAKVERIRHKRAEYFRKHGQ<br>MHGVLPRLTTSSGNHSKQPHRRGSPYSKRRAPLRRWIRRLGGCTVCCASVILFLLMSAVFLAVKSWPGAAVVSFAFDLGTDESPANVWRGGERGEHDAEEWGGGEIAGKLDLGYTA<br>MVGVDVAPPTSIADLGLPPLRIYVYELPPSFNVDFLRNPRCASHLFAAEVAIHRALLQSPVRTLQPAEADFFVYVYACNFNTENGFPNLSGAPEQLRTAVELLAAYQWNRNTRGRDHV<br>ATHDFGACFHAMEKAAVQAGVPQFLRNSILQTFGQTNHPCQDVHDIQIPYVPSPLVANWQPPEQNRITFAYMSGKIEVHPKESVSDVYGRAVRTGIWKRFRHDKRFLIRKREAYY<br>EEMLHARFCLCPRGWAPWSPRIVESVLFQICPIVIADHIKLPFDLLNWPAMGLILQENEVPLNATILELSEDRVASMQRLEWRRAEVRRTLLLEPSVRGBATWQILDALAKKMERDKLQ |
| IRX8 ortholog                                                                                   |                                                                                                                                                                                                                                                                                                                                                                                                                                                                                                                                                                                                                                                                                                                                                                                                                                                                                                                                                                                                                                                                                                                                                                                                                                                                                                                                                                                                                                                                                                                                                                                                                                                                                                                                                                                                                                                                                                                                                                                                                                                                                                                                                                                                                                                                                                        |
| kfi00095_0020 / KfirX8                                                                          | MKLIKSPMRRITITAEQDFHPMGLKSAPACCSYSCVMVSLGLALILPMLFITTAIVKLDISDNCIDGECYTRGRKMSPTDRADELVTGLLDVPVSVGRQLNEERTGVGGDAVVGEREETIDLI<br>AQVSELNDDASVILKRALVEVHEGKARMAKLRALYRHFASKGVKGLHCLSLRTADYSTNPEANRPLAGPEISRLTNSLRHFVLLSDNVLATSVVNVTNAKEPEKVVHVVTDETTY<br>SAMHAWFALFPEPATIEVRGVHEMQWLTAAKAPVLDLMEENSALQKLNYGDRILEEAANDPPQVLAALKQARSFKYISIMNHLRMYLPEVPELDRIFLDVDDVVQKDLTGLWEMDMRG<br>KVNAGVETCRGADRFALSKQFRSYFNFSNPIAEHFAPETCAWAFGLNVFDLKRWRNSNITETIYHWQKQNMMLNMTLWRLGTLPPALIAFYGHTLPLDHSWHMLGLGQYQDSSIEVKSSA<br>VIHYNGPAKPVLDMAFTDFRSYWRWVDYGNFVHCNIFQMRMMGKRKAPSSSSTPPGQKAGPRQDSGAADGSLPERRSFVHGSFAFLVCFACFLGFRLSWEGKAAFLGAYRIGPES<br>GKLVLRDTGSLDYADSESGGAAQGGDLRPGAWESGQDKYAGVADGWERIETRIASAGGVNASESNRSRLLPRPPSPPEHPVWGRHNISVRPWPHPDAGETLAAHALIAAVQ<br>REQNQFVPLDRRKRMIIVTPTTYRRAAFQJHLSLHDLTDLRAPEPLSWLVEAGGTEETQAILSKTGLADHLLPVPVGTMPDVRAPEPPIVEDYLRDVALGIYQKQAMEGVVVFADDSATL<br>RLALFQELQKVRWFAAFVSGMLVQGGGSQVDLPVQGPVCGPEGDVRGWHAADHELLRKKPAVVPKRALLGAAEKRLPGGEGAQRRLLALEVPTEFGFAGSISQLGAGTVVRQLQ<br>VEQSEYFELFIPKLEWVGFANARLLWAPAERPAWLREWKPSTTLGKVDVAVGDEDEPTDLARMVDEDSQVETLGRCKDVLAWLWVAAEEGQYPAGWRLAENLPVVAEPQE<br>WSEEQWAEYEARLVEEKKKKKKKKKKAPEATKVEEDAAARQAAEQAAAEARRVEEKEQRELEAARQAEERQTRLAEQAQAEVEDNLDVQKAKAEVRTDPEKEGEKAEKLESSALA<br>EKEALTNNAEVLNKLVEGADGGVADDTQAREKQTS                                                                                                                                                                                                                                                                                                                                                                                                                                                                                                                                                                                                                                                                                                                                                                                                                                                                                                                                                                                                                   |
| IRX9 ortholog                                                                                   |                                                                                                                                                                                                                                                                                                                                                                                                                                                                                                                                                                                                                                                                                                                                                                                                                                                                                                                                                                                                                                                                                                                                                                                                                                                                                                                                                                                                                                                                                                                                                                                                                                                                                                                                                                                                                                                                                                                                                                                                                                                                                                                                                                                                                                                                                                        |
| >kfi00579_0060 / KfirX9                                                                         | MPPGGKPMKHAHPIIGSLNRRPPLLGFCLLGFLLGVDFTRRFEASFDAVSHSFGQALEDQRLVGVAGASRILVQQQLPAQPRLEAPVQLLIVTPTYNRPQAMYLTRLAHTLRLVRPP<br>VLWVIVETGWQSEESVALLMRTGLMYRHLVWQFSPQHKDRGVHQRNHALDHIQQHALQGVVYFADDDNNYSVELFEIRKVKRFGVLPVAMLEVEGAETKTEIGPVCAGGRVIGWHTSEES<br>AAQRRFHSDLGCFANSSLMWEPGGEGRRRNAPVFRDNIKEGQETTFIEQLVGSEAEEMGLADCREVLVWHLRAEAARDSVYPTSWMLRASMNITTPARTPESIREP                                                                                                                                                                                                                                                                                                                                                                                                                                                                                                                                                                                                                                                                                                                                                                                                                                                                                                                                                                                                                                                                                                                                                                                                                                                                                                                                                                                                                                                                                                                                                                                                                                                                                                                                                                                                                                                                                                                                        |
| IRX14 ortholog                                                                                  |                                                                                                                                                                                                                                                                                                                                                                                                                                                                                                                                                                                                                                                                                                                                                                                                                                                                                                                                                                                                                                                                                                                                                                                                                                                                                                                                                                                                                                                                                                                                                                                                                                                                                                                                                                                                                                                                                                                                                                                                                                                                                                                                                                                                                                                                                                        |
| kfi00262_0200 / KfirX14                                                                         | MMGKRKAPSSSTPPGQKAGPRQDSGAADGSLPERRSFVHGSFAFLVCFACFLGFRLSWEGKAAFLGAYRIGPESGKLVLRDTGSLDYADSESGGAAQGGDLRPGAWESGQDKYGA<br>GVADGWERIETRIASAGGVNASESNRSRLLPRPPSPPEHPVWGRHNISVRPWPHPDAGETLAAHALIAAVQREQNQFVPLDRRKRMIIVTPTTYRRAAFQJHLSLHDLTDLRAPEPL<br>VLVVEAGGTEETQAILSKTGLADHLLPVPVGTMPDVRAPEPPIVEDYLRDVALGIYQKQAMEGVVVFADDSATLRLALFQELQKVRWFAAFVSGMLVQGGGSQVDLPVQGPVCGPEGD<br>RGWHAADHELLRKKPAVVPKRALLGAAEKRLPGGEGAQRRLLALEVPTEFGFAGSISQLGAGTVVRQLQVEQSEYFELFIPKLEWVGFANARLLWAPAERPAWLREWKPSTTLG<br>KVDVAVGDEGDEPTDLARMVDEDSQVETLGRCKDVLAWLWVAAEEGQYPAGWRLAENLPVVAEPQEWSQWAEYEARLVEEKKKKKKKKKKAPEATKVEEDAAARQAA<br>EQAAAEARRVEEKEQRELEAARQAEERQTRLAEQAQAEVEDNLDVQKAKAEVRTDPEKEGEKAEKLESSALAEKALTNNAEVLNKLVEGADGGVADDTQAREKQTS                                                                                                                                                                                                                                                                                                                                                                                                                                                                                                                                                                                                                                                                                                                                                                                                                                                                                                                                                                                                                                                                                                                                                                                                                                                                                                                                                                                                                                                                                                                                                                              |

**Table S3** Protein BLAST analysis of *Klebsormidium flaccidum* xylan gene orthologs

| Supplementary Table S2. Protein BLAST analysis of <i>Klebsormidium flaccidum</i> xylan gene orthologs |             |             |             |               |             |
|-------------------------------------------------------------------------------------------------------|-------------|-------------|-------------|---------------|-------------|
| Protein name                                                                                          | Max score   | Total score | Query cover | E value       | Ident       |
| <b>IRX10L</b>                                                                                         | <b>860</b>  | <b>860</b>  | <b>1</b>    | <b>0</b>      | <b>1</b>    |
| Potri012G109600                                                                                       | 778         | 778         | 0.95        | 0             | 0.93        |
| PoIRX10_5                                                                                             | 764         | 764         | 1           | 0             | 0.88        |
| IRX10                                                                                                 | 750         | 750         | 1           | 0             | 0.86        |
| Potri003G162000                                                                                       | 741         | 741         | 0.93        | 0             | 0.9         |
| Potri001G068100                                                                                       | 738         | 738         | 0.99        | 0             | 0.85        |
| Os01g70200                                                                                            | 732         | 732         | 0.96        | 0             | 0.86        |
| PoIRX10_6                                                                                             | 730         | 730         | 0.95        | 0             | 0.86        |
| Bd2g59410                                                                                             | 720         | 720         | 0.93        | 0             | 0.87        |
| Potri012G109200                                                                                       | 719         | 719         | 0.95        | 0             | 0.88        |
| Os02g32110                                                                                            | 719         | 719         | 0.93        | 0             | 0.88        |
| Os01g70190                                                                                            | 716         | 716         | 0.94        | 0             | 0.85        |
| Sm442111                                                                                              | 711         | 711         | 0.93        | 0             | 0.87        |
| Bd2g59400                                                                                             | 711         | 711         | 0.93        | 0             | 0.85        |
| Os04g32670                                                                                            | 711         | 711         | 0.93        | 0             | 0.86        |
| Bd5g08400                                                                                             | 710         | 710         | 0.93        | 0             | 0.86        |
| PoIRX10_3                                                                                             | 708         | 708         | 0.98        | 0             | 0.81        |
| Bd3g44420                                                                                             | 703         | 703         | 0.93        | 0             | 0.85        |
| Pp1s7_455V6                                                                                           | 674         | 674         | 0.99        | 0             | 0.77        |
| Bd2g59380                                                                                             | 667         | 667         | 0.92        | 0             | 0.8         |
| Os01g70180                                                                                            | 650         | 650         | 0.94        | 0             | 0.77        |
| Os10g10080                                                                                            | 644         | 644         | 0.98        | 0             | 0.74        |
| <b>kfl00398_0130 / KflRX10</b>                                                                        | <b>620</b>  | <b>620</b>  | <b>0.9</b>  | <b>0</b>      | <b>0.75</b> |
| PoIRX10_1                                                                                             | 593         | 593         | 0.97        | 0             | 0.69        |
| PoIRX10_2                                                                                             | 573         | 573         | 0.88        | 0             | 0.73        |
| PoIRX10_4                                                                                             | 566         | 566         | 0.91        | 0             | 0.71        |
| <b>kfl00254_0250</b>                                                                                  | <b>379</b>  | <b>379</b>  | <b>0.83</b> | <b>4E-130</b> | <b>0.5</b>  |
| <b>kfl00144_0240</b>                                                                                  | <b>345</b>  | <b>345</b>  | <b>0.84</b> | <b>2E-115</b> | <b>0.47</b> |
| <b>kfl00113_0290</b>                                                                                  | <b>314</b>  | <b>314</b>  | <b>0.81</b> | <b>4E-106</b> | <b>0.46</b> |
| FRA8                                                                                                  | 299         | 318         | 0.87        | 1E-100        | 0.42        |
| XGD1                                                                                                  | 103         | 103         | 0.62        | 4E-27         | 0.3         |
| <b>AtIRX8</b>                                                                                         | <b>1112</b> | <b>1112</b> | <b>1</b>    | <b>0</b>      | <b>1</b>    |
| Potri.001G416800                                                                                      | 901         | 901         | 1           | 0             | 0.82        |
| Potri.011G132600                                                                                      | 871         | 871         | 0.99        | 0             | 0.81        |
| Potri.004G124500                                                                                      | 634         | 634         | 1           | 0             | 0.55        |
| Potri.017G090800                                                                                      | 622         | 622         | 1           | 0             | 0.54        |
| Bradi4g03670                                                                                          | 596         | 596         | 0.99        | 0             | 0.54        |
| LOC_Os12g38930                                                                                        | 583         | 583         | 0.95        | 0             | 0.55        |
| Potri.004G124500                                                                                      | 574         | 574         | 0.87        | 0             | 0.57        |
| Bradi1g70290                                                                                          | 571         | 571         | 0.99        | 0             | 0.51        |
| Bradi1g70290                                                                                          | 571         | 571         | 0.99        | 0             | 0.51        |
| LOC_Os03g11330                                                                                        | 566         | 566         | 0.99        | 0             | 0.5         |
| <b>kfl00095_0020_IRX8</b>                                                                             | <b>478</b>  | <b>478</b>  | <b>0.99</b> | <b>2E-159</b> | <b>0.43</b> |
| <b>AtIRX9-L</b>                                                                                       | <b>823</b>  | <b>823</b>  | <b>1</b>    | <b>0</b>      | <b>1</b>    |
| <b>kfl00579_0060_IRX9</b>                                                                             | <b>288</b>  | <b>288</b>  | <b>0.74</b> | <b>8E-99</b>  | <b>0.49</b> |
| Potri.016G086400                                                                                      | 244         | 244         | 0.79        | 9E-82         | 0.42        |
| Potri.006G131000                                                                                      | 242         | 242         | 0.79        | 1E-80         | 0.41        |
| AtIRX9                                                                                                | 218         | 218         | 0.77        | 1E-71         | 0.39        |
| Bradi2g37970                                                                                          | 172         | 172         | 0.79        | 2E-53         | 0.34        |
| LOC_Os05g03174                                                                                        | 169         | 169         | 0.81        | 2E-52         | 0.33        |
| LOC_Os04g58040                                                                                        | 50.4        | 68.9        | 0.26        | 1E-10         | 0.39        |
| <b>AtIRX14</b>                                                                                        | <b>1082</b> | <b>1082</b> | <b>1</b>    | <b>0</b>      | <b>1</b>    |
| AtIRX14-L                                                                                             | 652         | 652         | 0.96        | 0             | 0.65        |
| Potri.007G047500                                                                                      | 642         | 642         | 0.88        | 0             | 0.7         |
| Potri.005G141500                                                                                      | 640         | 640         | 1           | 0             | 0.65        |
| Potri.007G047500                                                                                      | 589         | 589         | 0.83        | 0             | 0.69        |
| Bradi1g33320                                                                                          | 480         | 480         | 0.8         | 2E-169        | 0.54        |
| LOC_Os06g47340                                                                                        | 475         | 475         | 0.8         | 2E-167        | 0.55        |
| LOC_Os04g55670                                                                                        | 246         | 246         | 0.84        | 2E-79         | 0.36        |
| <b>kfl00262_0200_IRX14</b>                                                                            | <b>206</b>  | <b>350</b>  | <b>0.8</b>  | <b>4E-62</b>  | <b>0.35</b> |

Pairwise protein sequence comparison was performed using BLAST (Altschul et al., 1997). For each sub section of the table the proteins are compared pairwise with the top entry made in bold. *K. flaccidum* proteins are indicated in red.

**Notes S1** Newick tree files and sequences used for Fig. 2 and Fig. S2-S9.
